# Supplementary material for: Lentiviral Vector Purification Using Nanofiber Ion-Exchange Chromatography
Source: PubMed Central journal article supplement (PMC6804883; doi:10.1016/j.omtm.2019.08.007), 2019-08-30
Supplement: mmc1.pdf [file mmc1.pdf]

**OMTM, Volume 15**

**Supplemental Information**

**Lentiviral Vector Purification Using**

**Nanofiber Ion-Exchange Chromatography**

**Jelena Ruscic, Christopher Perry, Tarit Mukhopadhyay, Yasu Takeuchi, and Daniel G. Bracewell**

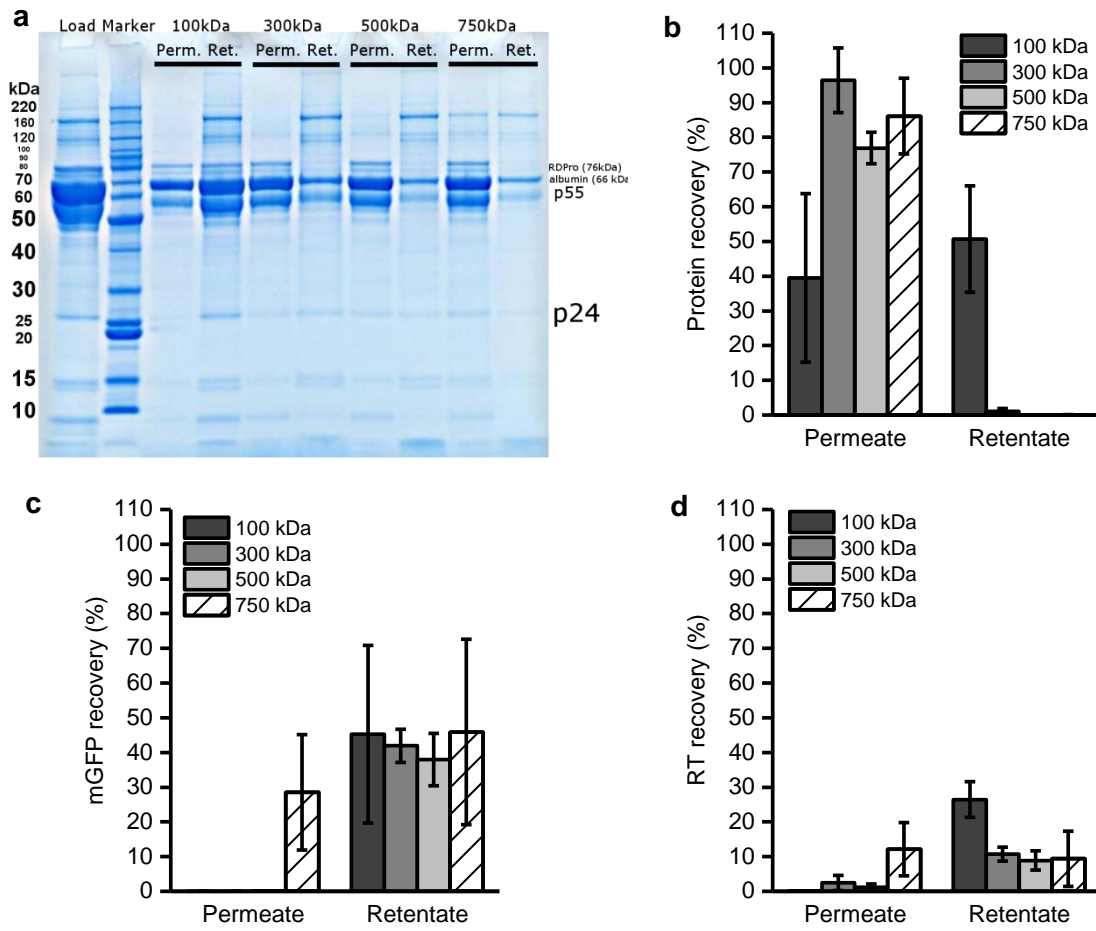

**Fig. S1** | **a**, SDS-PAGE analysis, visualized by Coomassie stain, of diafiltration (DF) experiments using hollow fibre with different MWCO sizes (100kDa, 300kDa, 500kDa, and 750kDa). LV batch from harvest A (7 dps; Supplementary Fig 1a,b) was used in DF which was performed in triplicate. Permeate and retentate samples were tested with **b**, DC protein assay, **c**, RT-qPCR, and **d**, SG-PERT.

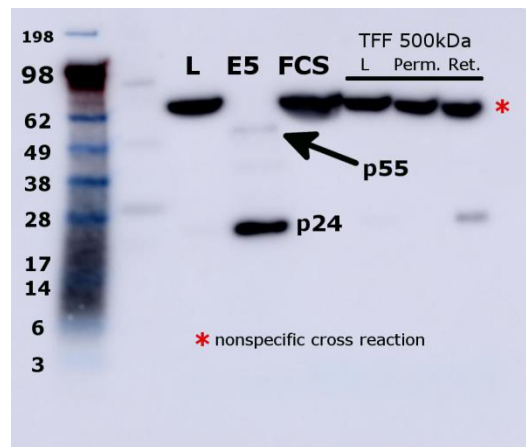

**Fig. S2** | p24 Western blot analysis of selected fractions performed using polyclonal p24 primary antibody: chromatography load (L), elution fraction (E5) and foetal calf serum (FCS). Samples from diafiltration experiments with 500kDa MWCO hollow fiber were also analysed (L – load, perm. – permeate, and ret. – retentate).

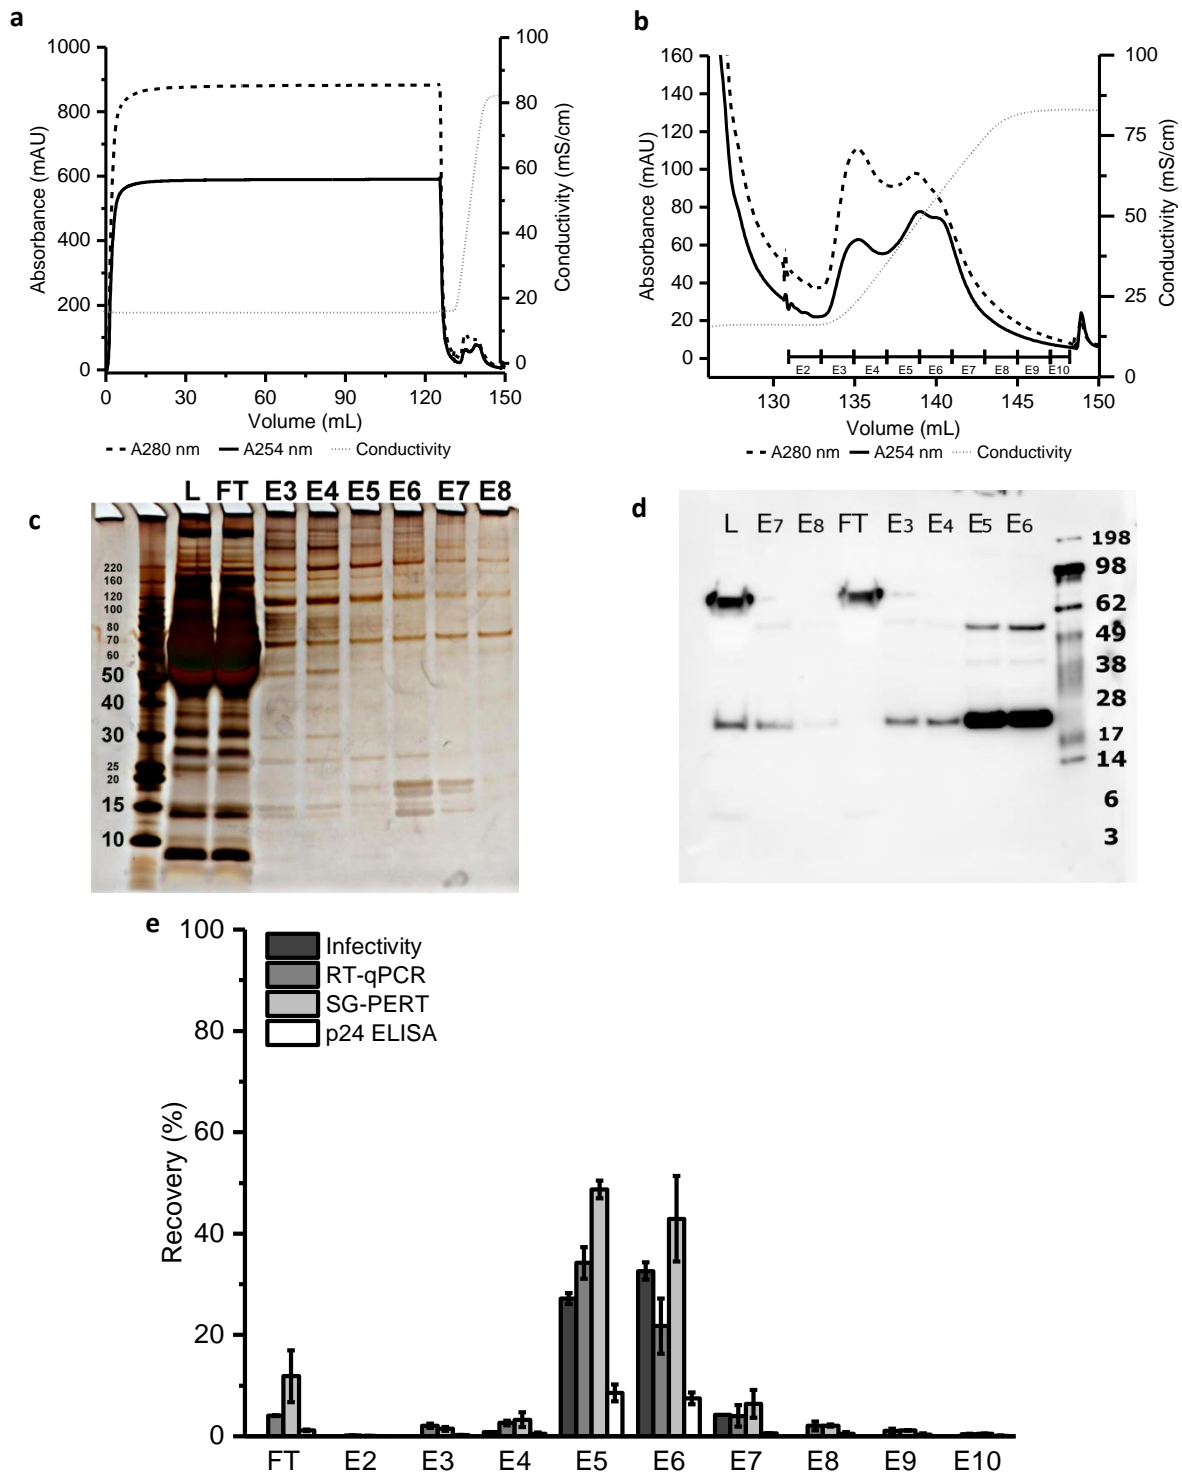

**Fig. S3** | A) Representative chromatograms performed with 3 dps batch from harvest B directly loaded on to RCQ with B) closer look at the elution profile and corresponding C) SDS-PAGE visualised with silver staining and D) p24 Western blot analysis of selected fractions. Chromatography was done in duplicate and E) LV recovery analysis was performed for both runs. L – load, FT - flow through, E – elution fraction Error bars in e) represent mean  $\pm$ 1 SD

**Table S1** Removal of host cell proteins (HCP) and host cell DNA determined by HEK 293 HCP ELISA kit (Cygnus Technologies) and Femto™ Human DNA Quantification Kit (Zymo Research) respectively. Fractions from three runs were analysed. Load from run I was four times diluted with the loading buffer (Supplementary Fig.4). Loads from runs II (Supplementary Fig. 6) and III (Figure 1) were not diluted

| run  | HCP (ng/mL)       |                     |                     | Total HCP (ng)      |                     |                     | Log10 reduction value (LRV) |
|------|-------------------|---------------------|---------------------|---------------------|---------------------|---------------------|-----------------------------|
|      | I                 | II                  | III                 | I                   | II                  | III                 |                             |
| load | 73.6              | 57.5                | 781.1               | 7.4x10 <sup>3</sup> | 7.2x10 <sup>3</sup> | 3.1x10 <sup>5</sup> |                             |
| FT   | 45.2              | 25.1                | 1.1x10 <sup>3</sup> | 4.7x10 <sup>3</sup> | 3.3x10 <sup>3</sup> | 4.4x10 <sup>5</sup> | 0.1 +/- 0.3                 |
| E3   | 37.5              | 89.7                | 149.4               | 74.9                | 179.5               | 298.9               | 2.2 +/- 0.7                 |
| E4   | 44.2              | 100.5               | 171.6               | 88.3                | 201.0               | 343.3               | 2.1 +/- 0.7                 |
| E5   | 25.7              | 158.2               | 87.5                | 51.5                | 316.4               | 175.0               | 2.3 +/- 1.0                 |
| E6   | 11.6              | 84.0                | 45.1                | 23.2                | 167.9               | 90.1                | 2.6 +/- 1.0                 |
| E7   | 1.1               | 13.9                | 18.3                | 2.3                 | 27.9                | 36.6                | 3.3 +/- 0.8                 |
| E8   | 0.6               | 6.8                 | 18.3                | 1.1                 | 13.5                | 36.6                | 3.5 +/- 0.7                 |
| run  | HC DNA(ng/mL)     |                     |                     | Total HC DNA (ng)   |                     |                     | Log10 reduction value (LRV) |
|      | I                 | II                  | III                 | I                   | II                  | III                 |                             |
| load | 104.8             | 275.3               | 540.0               | 1x10 <sup>4</sup>   | 3.4x10 <sup>4</sup> | 2.2x10 <sup>5</sup> |                             |
| FT   | 0.1               | 0.1                 | 0.1                 | 12.8                | 15.3                | 57.0                | 3.3 +/- 0.3                 |
| E3   | 0.2               | 0.5                 | 4.8                 | 0.4                 | 0.9                 | 9.5                 | 4.5 +/- 0.1                 |
| E4   | 3.3               | 13.8                | 467.8               | 6.7                 | 27.6                | 938.5               | 2.9 +/- 0.5                 |
| E5   | 178.9             | 730.9               | 2.8x10 <sup>4</sup> | 357.7               | 3.4x10 <sup>4</sup> | 5.7x10 <sup>4</sup> | 1.1 +/- 0.5                 |
| E6   | 3x10 <sup>3</sup> | 3.7x10 <sup>3</sup> | 4.6x10 <sup>4</sup> | 5.9x10 <sup>3</sup> | 7.5x10 <sup>3</sup> | 9.3x10 <sup>4</sup> | 0.4 +/- 0.2                 |
| E7   | 2x10 <sup>3</sup> | 4.5x10 <sup>3</sup> | 1.5x10 <sup>4</sup> | 4x10 <sup>3</sup>   | 9x10 <sup>3</sup>   | 2.9x10 <sup>4</sup> | 0.6 +/- 0.2                 |
| E8   | 291.8             | 1.1x10 <sup>3</sup> | 2.2x10 <sup>4</sup> | 583.7               | 2.2x10 <sup>3</sup> | 4.5x10 <sup>4</sup> | 1.0 +/- 0.3                 |
